# Supplementary material
Source: publisher site journal article supplement (https://www.dovepress.com/get_supplementary_file.php?f=327858.docx)
Supplement: Supplementary file 1 [file get_supplementary_file.php]

Supplemental Table 1 qPCR primers

| Primer | 5’ to 3’ |
| --- | --- |
| Adiponectin-F | GCACTGGCAAGTTCTACTGCAA |
| Adiponectin-R | GTAGGTGAAGAGAACGGCCTTGT |
| GAPDH-F | AGGTCGGTGTGAACGGATTTG |
| GAPDH-R | TGTAGACCATGTAGTTGAGGTCA |
| IL-1β-F | GCAACTGTTCCTGAACTCAACT |
| IL-1β-R | ATCTTTTGGGGTCCGTCAACT |
| IL-6-F | CCACTTCACAAGTCGGAGGCTTA |
| IL-6-R | GCAAGTGCATCATCGTTGTTCATAC |
| Leptin-F | GACACCAAAACCCTCAT |
| Leptin-R | CAGTGTCTGGTCCATCT |
| MCP-1-F | AGCAGCAGGTGTCCCAAAGA |
| MCP-1-R | GTGCTGAAGACCTTAGGGCAGA |
| TNF-α-F | GACGTGGAACTGGCAGAAGAG |
| TNF-α-R | TTGGTGGTTTGTGAGTGTGAG |
